# Supplementary material for: Division-Specific Differences in Bacterial Community Assembly of Two Alkaline Hot Spring Ecosystems from Yellowstone National Park
Source: Springer Nature journal article supplement (doi:10.1007/s00248-013-0214-3), 2013-03-25
Supplement: MOESM1 [file 248_2013_214_MOESM1_ESM.xlsx]

## Sheet: Acidobacteria
Michael L. Weltzer and Scott R. Miller. Division-specific differences in bacterial community assembly of two alkaline hot spring ecosystems from Yellowstone National Park. Microbial Ecology. Division of Biological Sciences, The University of Montana, Missoula, MT 59812 USA. E-mail scott.miller@umontana.edu
Presence/absence data for the 39 samples
OTU	RC1a	RC1b	RC2a	RC2b	RC3a	RC3b	RC4a	RC4b	RC5a	RC5b	RC6a	RC6b	RC7a	RC7b	RC8a	RC8b	RC9a	RC9b	RC10b	RC10c	WC1a	WC1b	WC2a	WC2b	WC3b	WC3c	WC4a	WC4b	WC5a	WC5b	WC6a	WC6b	WC7a	WC7b	WC8a	WC8b	WC9a	WC9b	WC10c
1	0	0	0	0	0	0	2	1	1	2	20	18	91	83	20	11	0	5	0	0	0	1	0	0	1	0	0	0	0	0	0	1	15	9	35	27	0	0	0
2	5	2	10	9	74	37	96	67	68	45	0	0	0	0	0	0	0	0	0	0	0	0	1	1	19	5	6	7	17	14	55	56	2	13	0	0	0	0	1
3	35	15	32	40	32	16	2	0	0	0	0	0	0	0	0	0	0	0	0	0	18	5	31	63	94	33	5	4	0	0	0	0	0	0	0	0	0	0	0
4	4	1	30	19	63	55	23	3	17	0	0	0	0	0	0	0	0	0	0	0	1	0	0	3	43	6	25	17	23	13	10	3	0	0	0	0	0	0	0
5	0	0	0	0	0	0	0	0	1	0	3	1	13	12	0	0	0	0	0	0	0	0	0	0	0	0	0	0	0	0	0	0	0	0	0	0	0	0	0

## Sheet: Armatimonadetes
Michael L. Weltzer and Scott R. Miller. Division-specific differences in bacterial community assembly of two alkaline hot spring ecosystems from Yellowstone National Park. Microbial Ecology. Division of Biological Sciences, The University of Montana, Missoula, MT 59812 USA. E-mail scott.miller@umontana.edu
Presence/absence data for the 39 samples
OTU	RC1a	RC1b	RC2a	RC2b	RC3a	RC3b	RC4a	RC4b	RC5a	RC5b	RC6a	RC6b	RC7a	RC7b	RC8a	RC8b	RC9a	RC9b	RC10b	RC10c	WC1a	WC1b	WC2a	WC2b	WC3b	WC3c	WC4a	WC4b	WC5a	WC5b	WC6a	WC6b	WC7a	WC7b	WC8a	WC8b	WC9a	WC9b	WC10c
1	0	1	2	0	1	2	1	0	1	0	2	0	1	4	1	1	1	5	2	1	0	1	0	0	0	2	0	0	1	0	0	0	0	0	2	1	2	1	15
2	0	0	0	0	0	0	0	0	0	0	0	0	0	0	0	0	0	0	0	0	1	0	0	0	0	0	0	0	0	0	0	1	0	0	1	0	2	0	2
3	0	0	0	3	0	0	0	0	0	2	0	0	0	0	2	1	1	0	0	1	0	0	0	0	0	1	0	0	1	0	0	1	0	0	0	1	1	0	2
4	5	1	28	27	26	47	13	7	34	35	92	43	73	130	147	117	190	185	135	110	2	4	3	2	12	4	5	6	10	4	20	14	12	3	48	21	81	78	548
5	0	0	0	6	3	3	0	1	1	0	1	2	0	4	2	6	6	45	2	1	0	0	1	0	1	0	0	2	4	0	0	1	1	1	0	1	21	18	44
6	0	0	0	0	0	0	0	0	0	0	0	0	0	0	0	0	0	0	0	0	0	0	0	0	0	0	0	0	0	1	0	0	0	0	4	3	3	3	3
7	0	0	0	0	0	0	0	0	0	0	0	0	0	0	0	0	0	0	0	0	0	3	0	1	12	0	1	0	0	0	0	0	0	0	0	0	0	0	0
8	0	0	0	0	0	0	0	0	0	3	7	3	6	12	1	2	7	4	0	0	0	0	0	0	0	0	0	2	5	0	0	0	1	2	1	1	5	6	1

## Sheet: CFB
Michael L. Weltzer and Scott R. Miller. Division-specific differences in bacterial community assembly of two alkaline hot spring ecosystems from Yellowstone National Park. Microbial Ecology. Division of Biological Sciences, The University of Montana, Missoula, MT 59812 USA. E-mail scott.miller@umontana.edu
Presence/absence data for the 39 samples
OTU	RC1a	RC1b	RC2a	RC2b	RC3a	RC3b	RC4a	RC4b	RC5a	RC5b	RC6a	RC6b	RC7a	RC7b	RC8a	RC8b	RC9a	RC9b	RC10b	RC10c	WC1a	WC1b	WC2a	WC2b	WC3b	WC3c	WC4a	WC4b	WC5a	WC5b	WC6a	WC6b	WC7a	WC7b	WC8a	WC8b	WC9a	WC9b	WC10c
1	0	0	0	0	0	0	0	0	0	0	0	0	0	0	0	0	0	0	0	0	4	2	7	0	0	13	0	0	0	0	0	0	0	0	0	0	0	0	0
2	0	0	0	0	0	0	0	0	0	0	0	0	0	0	0	0	0	0	0	0	10	2	0	2	2	15	0	0	0	1	0	0	0	0	0	0	0	0	0
3	1	0	1	0	0	0	0	0	0	0	0	0	0	0	0	0	0	0	0	0	0	0	0	0	0	9	76	10	29	12	0	0	0	0	0	0	0	0	0
4	0	0	2	2	5	3	2	0	2	0	0	0	0	0	0	0	0	0	0	0	1	0	1	0	0	0	5	0	1	2	0	0	0	0	0	0	0	0	0
5	1	7	0	0	0	0	0	0	0	0	0	0	0	0	0	0	0	0	0	0	31	25	3	10	18	2	0	0	0	0	0	0	0	0	0	0	0	0	0
6	0	3	0	0	0	0	0	0	0	0	0	0	0	0	0	0	0	0	0	0	13	10	5	7	6	1	0	0	0	0	0	0	0	0	0	0	0	0	0
7	23	14	1	0	0	0	0	0	0	0	0	0	0	0	0	0	0	0	0	0	4	6	10	8	5	2	1	0	0	0	0	0	0	0	0	0	0	0	0
8	0	0	21	25	20	6	14	7	0	2	0	0	0	0	0	0	0	0	0	0	0	0	1	3	5	1	0	0	0	0	0	0	0	0	0	0	0	0	0
9	0	0	2	5	17	5	32	8	16	12	0	0	0	0	0	0	0	0	0	0	0	0	0	0	0	0	0	1	6	1	7	4	9	9	0	0	0	0	0
10	0	0	0	2	5	5	2	0	3	0	0	0	0	0	0	0	0	0	0	0	1	1	0	0	1	0	0	0	1	1	0	0	0	0	0	0	0	0	0
11	0	0	0	0	0	0	0	0	0	0	0	0	0	0	0	0	0	0	0	0	13	19	1	1	3	5	0	0	0	0	0	0	0	0	0	0	0	0	0
12	5	1	5	6	25	18	3	4	6	5	0	0	0	0	0	0	1	0	0	0	48	35	56	34	26	3	36	38	58	52	31	41	11	11	4	0	0	0	0
13	0	0	0	0	0	0	0	0	0	0	0	0	0	0	0	0	0	0	0	0	0	0	0	1	4	0	0	5	5	2	0	0	0	0	0	0	0	0	0
14	0	0	0	0	0	0	1	0	0	0	0	0	0	0	0	0	0	0	0	0	0	1	4	3	0	0	1	0	3	0	0	0	0	0	0	0	0	0	0
15	0	0	0	0	0	1	0	0	0	1	0	0	0	0	0	0	0	0	0	0	3	0	3	3	0	0	0	0	2	0	0	0	0	0	0	0	0	0	0
16	0	0	0	1	1	3	3	0	0	0	0	0	0	0	0	0	0	0	0	0	0	2	6	3	0	0	6	0	7	0	0	0	0	0	0	0	0	0	0
17	1	0	0	0	0	0	0	5	8	0	0	0	0	0	0	0	0	0	0	0	0	2	0	0	0	0	0	0	2	0	0	0	0	0	0	0	0	0	0
18	0	0	0	1	1	1	4	18	1	6	0	0	0	0	0	0	0	0	0	0	0	0	0	0	0	0	0	0	0	0	2	1	0	0	0	0	0	0	0
19	7	18	2	3	6	3	3	3	3	4	0	0	0	0	0	0	0	0	0	0	4	1	2	1	2	0	0	0	0	0	2	1	0	1	0	0	0	0	0
20	0	0	0	0	0	0	0	0	0	0	0	0	0	0	0	0	0	0	0	0	1	1	0	0	0	0	0	0	0	0	0	0	0	0	0	0	0	0	0
21	0	0	0	0	0	0	0	0	0	0	0	0	0	0	0	0	0	0	0	0	0	1	0	0	0	0	0	0	0	0	0	0	0	0	0	0	0	0	0
22	0	0	0	0	0	0	0	0	0	0	0	0	0	0	0	0	0	0	0	0	0	0	0	0	0	0	0	0	0	0	0	0	0	0	0	0	0	0	1
23	0	0	0	0	0	0	0	0	0	0	2	0	0	2	1	0	0	0	0	0	0	0	0	0	0	0	0	0	0	0	0	0	0	0	1	0	0	0	0
24	0	0	0	0	1	0	0	0	0	0	0	0	0	0	0	0	0	0	0	0	0	0	0	0	0	0	0	0	0	1	0	0	0	0	0	1	0	0	0
25	0	0	0	0	0	0	0	0	0	0	0	0	0	0	0	0	0	0	0	0	2	0	0	1	0	0	0	0	0	0	0	0	0	0	0	0	0	0	0
26	0	0	0	0	1	0	0	0	0	0	0	0	0	0	0	0	0	0	0	0	0	0	0	0	0	0	0	0	1	0	0	0	0	0	0	0	0	0	0
27	0	0	0	0	0	0	0	0	0	0	1	3	0	0	0	0	0	0	0	0	0	0	0	0	0	0	0	0	0	0	0	0	0	0	0	0	0	0	0
28	0	3	0	0	0	0	0	0	0	0	0	0	0	0	0	0	0	0	0	0	0	0	0	0	0	0	0	0	0	0	0	0	0	0	0	0	0	0	0
29	0	0	0	4	0	1	0	0	0	0	0	0	0	0	0	0	0	0	0	0	0	0	0	0	0	0	0	0	0	0	0	0	0	0	0	0	0	0	0
30	1	0	0	0	0	0	0	0	0	0	0	0	0	0	0	0	0	0	0	0	0	0	0	0	0	0	0	0	0	0	0	0	0	0	0	0	0	0	0
31	0	0	0	2	2	0	1	0	0	0	0	0	0	0	0	0	0	0	0	0	0	0	0	0	0	0	0	0	0	0	0	0	0	0	0	0	0	0	0
32	0	0	0	0	3	0	1	0	0	1	0	0	0	0	0	0	0	0	0	0	0	0	0	0	0	0	0	0	0	0	0	0	0	0	0	0	0	0	0
33	0	0	0	0	1	0	1	0	0	0	0	0	0	0	0	0	0	0	0	0	0	0	0	0	0	0	0	0	0	0	0	0	0	0	0	0	0	0	0

## Sheet: Chloroflexi
Michael L. Weltzer and Scott R. Miller. Division-specific differences in bacterial community assembly of two alkaline hot spring ecosystems from Yellowstone National Park. Microbial Ecology. Division of Biological Sciences, The University of Montana, Missoula, MT 59812 USA. E-mail scott.miller@umontana.edu
Presence/absence data for the 39 samples
OTU	RC1a	RC1b	RC2a	RC2b	RC3a	RC3b	RC4a	RC4b	RC5a	RC5b	RC6a	RC6b	RC7a	RC7b	RC8a	RC8b	RC9a	RC9b	RC10b	RC10c	WC1a	WC1b	WC2a	WC2b	WC3b	WC3c	WC4a	WC4b	WC5a	WC5b	WC6a	WC6b	WC7a	WC7b	WC8a	WC8b	WC9a	WC9b	WC10c
1	1	0	31	20	17	24	16	39	50	26	8	16	22	76	2	32	1	8	0	45	26	35	44	71	56	131	116	115	256	151	106	75	68	56	126	147	108	118	0
2	0	0	0	0	0	0	1	0	0	0	0	0	0	0	0	0	0	0	0	0	0	1	16	0	4	0	0	18	8	0	0	2	0	4	0	0	13	11	0
3	0	0	0	0	0	0	0	0	0	0	1	0	1	4	0	1	0	0	0	0	0	2	5	1	3	2	0	0	9	2	3	1	0	0	0	2	0	0	0
4	0	0	0	0	1	1	0	0	0	0	0	0	0	0	0	0	0	0	0	0	4	0	0	6	2	13	1	0	0	1	0	0	0	0	0	0	0	0	0
5	0	0	0	3	0	1	0	3	8	1	0	0	0	0	0	0	0	0	0	1	6	8	15	21	8	54	35	39	89	75	38	30	16	17	13	3	6	15	0
6	0	0	0	0	0	0	0	0	0	0	0	0	0	0	0	0	0	0	0	0	0	0	6	0	2	0	0	8	6	0	0	1	0	0	0	0	4	0	0
7	0	0	0	2	1	1	1	10	0	2	0	0	0	0	0	0	0	0	0	0	0	0	0	0	0	0	0	0	0	0	0	0	0	0	0	0	0	0	0
8	0	1	65	52	20	28	23	100	57	47	0	1	4	5	0	0	0	0	0	2	0	0	0	0	0	0	0	0	1	1	0	0	0	0	0	2	3	0	0
9	0	0	0	5	1	0	1	5	0	0	0	0	0	0	0	0	0	0	0	0	0	0	0	0	0	0	0	0	0	0	0	0	0	0	0	0	0	0	0
10	5	2	189	167	38	32	48	155	66	45	3	2	1	25	0	6	0	0	0	8	42	52	81	131	165	158	227	185	241	187	189	118	72	85	156	138	8	3	3
11	0	0	1	13	2	0	0	5	0	0	0	0	0	0	0	0	0	0	0	0	0	4	0	1	3	0	4	4	22	0	2	8	0	3	0	0	0	0	0
12	1	0	22	8	8	10	8	17	16	8	8	9	21	81	1	44	13	13	1	107	9	1	2	3	1	4	1	0	2	4	7	3	3	0	2	2	0	0	1
13	0	0	1	0	1	1	7	3	0	0	0	0	0	0	0	0	0	0	0	0	0	0	2	8	1	6	2	6	23	4	1	8	0	2	6	0	0	3	0
14	0	0	1	0	0	0	2	2	0	0	1	3	6	61	293	214	341	69	0	0	0	0	0	0	2	0	0	0	0	0	0	1	0	0	2	7	53	38	1
15	11	5	15	20	15	32	23	23	32	71	273	231	43	20	1	70	0	43	0	19	17	4	3	4	87	3	6	8	11	4	15	31	1	0	14	2	0	0	0
16	1	0	1	0	0	2	1	4	1	20	71	69	35	24	1	23	0	9	1	0	0	0	0	0	0	0	0	0	0	0	0	1	0	0	11	0	0	0	0
17	8	6	9	9	7	12	3	8	8	13	55	39	4	0	1	1	0	7	0	0	9	5	13	11	32	3	12	16	36	27	52	36	14	13	42	22	0	0	0
18	4	4	22	17	5	14	24	10	16	17	62	36	3	0	2	0	0	4	0	0	36	10	21	12	54	7	2	2	17	16	59	26	2	2	15	0	0	0	0
19	0	0	0	0	0	0	0	0	0	0	0	0	0	0	0	0	0	0	0	0	0	0	0	0	0	0	0	0	0	0	0	0	0	0	0	3	1	6	0
20	0	0	0	0	0	0	0	0	0	0	0	0	0	0	0	0	0	0	0	0	0	0	0	0	0	0	0	0	0	0	0	0	0	1	2	3	0	0	0
21	11	2	96	79	32	73	37	39	30	8	0	0	2	0	0	0	0	1	0	0	2	0	2	1	0	1	0	0	1	1	4	2	0	2	0	1	1	0	1
22	0	0	4	4	0	1	2	3	1	2	0	0	0	0	0	0	0	0	0	0	0	0	0	0	0	0	0	0	0	0	0	0	0	0	0	0	0	0	0
23	0	0	3	5	0	1	0	0	0	0	0	0	0	0	0	0	0	0	0	0	0	0	0	0	0	0	0	0	0	0	0	0	0	0	0	0	0	0	0
24	0	0	21	0	2	3	2	0	0	0	0	0	1	0	0	0	0	0	0	0	0	0	0	0	0	0	0	0	0	0	11	0	10	1	0	24	0	0	0
25	0	0	17	5	7	8	11	8	9	7	24	6	10	37	4	18	11	11	0	0	0	0	0	0	0	0	0	0	2	2	0	1	0	2	3	12	27	29	10
26	1	0	3	20	16	49	11	27	25	11	0	0	0	0	0	0	0	0	0	0	0	1	0	0	1	0	2	1	3	0	4	23	3	12	25	14	6	2	0
27	0	0	0	0	0	0	0	0	0	0	1	0	1	1	1	8	1	0	4	0	0	0	0	0	0	0	0	0	0	0	0	0	0	0	1	1	3	1	0
28	0	0	0	0	0	0	0	1	1	0	0	2	0	6	0	3	2	3	4	6	0	0	0	0	0	0	0	0	0	0	0	0	0	0	0	0	1	2	1
29	0	0	0	0	0	0	0	0	0	0	0	0	0	0	0	0	1	1	0	0	0	0	0	0	0	0	0	0	0	0	0	0	0	0	1	0	2	0	25
30	0	0	4	2	1	3	2	2	6	1	0	0	0	0	0	0	0	0	0	2	0	0	0	0	0	0	0	0	4	2	2	6	2	2	5	3	0	0	0
31	0	0	0	0	0	1	0	0	0	2	0	0	0	0	0	0	0	0	0	1	0	0	0	0	0	0	0	0	0	0	0	0	0	0	0	0	0	0	0
32	0	0	1	0	0	0	0	0	0	1	2	0	0	0	0	1	0	0	0	0	0	0	0	0	1	3	0	0	1	2	1	1	0	1	1	1	0	0	0
33	0	0	0	0	0	0	0	0	0	0	1	0	0	0	0	0	0	0	0	0	0	0	0	0	0	0	0	0	0	0	0	0	0	0	0	0	0	0	0
34	0	0	0	0	0	0	0	0	0	0	0	0	0	0	0	0	0	0	0	0	0	1	0	0	0	0	0	0	0	0	0	0	0	0	0	0	0	0	0
35	0	0	0	0	0	0	0	0	0	0	0	0	0	0	0	0	0	0	0	0	1	0	0	0	0	0	0	1	2	0	1	0	1	0	0	0	0	0	0
36	0	0	0	0	0	0	0	0	0	0	0	0	0	0	0	0	0	0	0	0	0	0	0	0	0	0	0	0	0	0	0	1	0	0	0	0	0	0	0
37	0	0	0	0	0	0	0	0	0	0	0	0	0	0	0	0	0	0	0	0	0	0	0	0	1	0	0	0	0	0	0	0	0	0	0	0	0	0	0
38	0	0	0	0	0	0	0	0	0	0	0	0	0	0	0	0	0	0	0	0	0	0	0	0	0	0	0	0	0	0	0	0	0	0	0	0	1	1	0
39	0	0	0	0	0	0	0	0	0	0	0	0	0	0	0	0	0	0	0	0	0	0	0	0	0	0	0	0	1	0	0	0	0	0	0	0	0	0	0
40	0	0	0	0	0	0	0	0	0	0	0	0	0	0	0	0	0	0	0	0	0	0	0	0	0	0	0	0	0	0	0	0	0	0	0	0	1	0	0
41	0	0	0	0	0	0	1	0	0	0	0	0	0	0	0	0	0	0	0	0	0	1	0	0	0	0	0	0	0	0	0	0	0	0	0	0	0	0	0
42	1	0	0	0	0	0	0	0	0	0	0	0	0	0	0	0	0	0	0	0	0	0	0	0	0	0	0	0	0	0	0	0	0	0	0	0	0	0	0
43	0	0	0	0	0	0	1	0	0	0	0	0	0	0	0	0	0	0	0	0	0	0	0	0	0	0	0	0	0	0	0	0	0	0	0	0	0	0	0
44	0	0	0	0	0	0	1	0	0	0	0	0	0	0	0	0	0	0	0	0	0	0	0	0	0	0	0	0	0	0	0	0	0	0	0	0	0	0	0

## Sheet: Cyanobacteria
Michael L. Weltzer and Scott R. Miller. Division-specific differences in bacterial community assembly of two alkaline hot spring ecosystems from Yellowstone National Park. Microbial Ecology. Division of Biological Sciences, The University of Montana, Missoula, MT 59812 USA. E-mail scott.miller@umontana.edu
Presence/absence data for the 39 samples
OTU	RC1a	RC1b	RC2a	RC2b	RC3a	RC3b	RC4a	RC4b	RC5a	RC5b	RC6a	RC6b	RC7a	RC7b	RC8a	RC8b	RC9a	RC9b	RC10b	RC10c	WC1a	WC1b	WC2a	WC2b	WC3b	WC3c	WC4a	WC4b	WC5a	WC5b	WC6a	WC6b	WC7a	WC7b	WC8a	WC8b	WC9a	WC9b	WC10c
1	15	3	15	7	11	9	8	4	1	2	0	0	0	0	0	0	0	0	0	0	0	0	1	0	4	1	0	0	1	0	0	0	0	0	0	0	0	0	0
2	0	1	0	0	0	2	0	0	1	0	0	0	3	0	30	2	0	0	0	4	1	0	0	0	0	1	0	0	0	0	2	18	11	8	22	40	0	2	0
3	16	15	105	131	123	95	155	213	123	131	131	96	32	32	0	0	0	21	0	0	0	0	2	3	10	11	9	30	7	18	54	50	224	153	147	259	1	0	3
4	0	0	0	0	0	0	0	0	0	0	0	0	1	0	8	9	102	116	215	244	0	0	2	2	1	1	0	0	0	0	11	0	1	0	15	28	111	222	2019
5	0	0	0	0	0	0	0	0	0	0	0	0	0	0	0	0	4	4	9	1	0	0	0	0	0	0	0	0	0	0	0	0	0	0	0	0	3	4	0
6	0	0	0	0	0	0	0	0	0	0	0	0	1	1	1	3	106	69	89	159	0	3	0	0	1	0	0	0	0	0	1	0	0	1	36	32	125	193	57
7	0	1	0	0	1	5	1	0	0	1	3	1	103	143	239	156	0	19	0	0	0	0	2	0	0	0	0	0	0	0	0	0	0	0	1	1	1	1	0
8	0	0	0	0	0	0	0	0	0	0	0	0	0	0	0	0	0	0	0	0	236	123	250	69	363	2	36	89	80	54	18	9	0	0	0	0	1	0	0
9	261	476	0	0	0	0	0	0	0	0	0	0	0	0	0	0	0	0	0	0	17	16	5	6	0	1	0	0	0	0	1	0	0	0	0	0	0	0	0
10	14	6	33	31	34	17	32	18	30	9	0	0	0	0	0	0	0	0	0	0	15	10	15	10	14	26	66	18	22	13	5	3	1	3	0	0	0	0	0
11	0	0	1	0	1	1	0	1	0	0	0	0	0	0	0	0	0	0	0	0	0	0	0	0	0	0	0	0	1	0	0	0	0	0	0	0	0	0	0
12	0	0	1	1	1	3	5	4	0	0	0	0	0	0	0	0	0	0	0	0	11	9	19	35	57	24	4	6	0	0	0	0	0	0	0	0	0	0	0
13	0	0	0	0	2	1	4	3	0	0	0	0	0	0	0	0	0	0	0	0	39	9	50	47	54	11	1	2	0	0	0	0	0	0	0	0	0	0	0
14	0	0	0	0	0	0	0	0	0	0	0	0	0	0	0	0	0	0	0	0	31	26	4	17	15	7	0	0	0	0	0	0	0	0	0	0	0	0	0
15	0	0	0	0	0	0	0	0	0	0	0	0	0	0	0	0	0	0	0	0	2	3	4	4	0	3	0	0	0	0	0	0	0	0	0	0	0	0	0
16	0	0	0	0	0	0	0	0	0	0	0	0	0	0	0	0	0	0	0	0	5	0	0	1	2	1	4	1	0	0	0	0	0	0	0	0	0	0	0
17	0	0	0	0	1	0	0	0	0	0	0	0	0	0	0	0	0	0	0	0	7	7	3	12	15	16	2	4	1	0	0	0	0	0	0	0	0	0	0
18	0	0	0	0	0	0	0	0	0	0	0	0	0	0	0	0	0	0	0	0	27	31	1	10	0	2	0	0	0	0	0	0	0	0	0	0	0	0	0
19	0	0	0	0	0	0	0	0	0	0	0	0	0	0	0	0	0	0	0	0	2	5	4	5	1	2	0	0	0	0	0	0	0	0	0	0	0	0	0
20	0	0	0	0	0	0	0	0	0	0	0	0	0	0	0	0	0	0	0	0	0	0	0	0	0	0	1	2	6	2	9	9	6	7	0	0	0	0	0
21	0	0	0	0	0	0	0	0	0	0	0	0	0	0	0	0	0	0	0	0	0	0	0	0	0	0	0	0	0	0	15	8	0	0	0	0	0	0	0
22	31	17	0	0	0	0	0	0	0	0	0	0	0	0	0	0	0	0	0	0	2	4	0	2	0	0	0	0	0	0	0	0	0	0	0	0	0	0	0
23	14	22	0	1	0	0	0	0	0	0	0	0	0	0	0	0	0	0	0	0	0	0	0	0	0	0	0	0	0	0	0	0	0	0	0	0	0	0	0
24	0	0	0	0	0	0	0	0	0	0	5	4	0	0	0	0	3	2	0	0	0	0	0	0	0	0	0	0	0	0	0	0	0	0	0	0	0	0	0
25	1	0	0	0	0	0	0	0	0	0	0	0	0	0	0	0	0	0	0	0	4	0	0	3	0	0	0	0	0	0	0	0	0	0	0	0	0	0	0
26	0	0	0	0	0	0	0	0	0	0	0	0	0	0	0	0	0	0	0	0	5	6	1	0	0	0	0	0	0	0	0	0	0	0	0	0	0	0	0
27	0	0	0	0	0	0	0	0	0	0	0	0	0	0	0	0	0	0	0	0	0	1	0	0	0	0	0	0	0	0	0	0	0	0	0	0	0	0	0
28	0	0	0	0	0	0	0	0	0	0	0	0	0	0	0	0	0	0	0	0	1	0	0	0	0	0	0	0	0	0	0	0	0	0	0	0	0	0	0
29	0	0	0	0	0	0	0	0	0	0	0	0	0	0	0	0	0	0	0	0	2	0	1	0	0	0	0	0	0	0	0	0	0	0	0	0	0	0	0
30	0	0	0	0	0	0	0	0	0	0	0	0	0	0	0	0	0	0	0	0	0	0	0	0	0	1	0	0	0	0	0	0	0	0	0	0	0	0	0
31	0	0	0	0	0	0	0	0	0	0	0	0	0	0	0	0	0	0	0	0	0	0	0	0	1	0	1	0	0	2	0	0	0	0	0	0	0	0	0
32	0	0	0	0	0	0	0	0	0	0	0	0	0	0	0	0	0	0	0	0	0	1	0	0	0	0	0	0	0	0	0	0	0	0	0	0	0	0	0
33	0	0	0	0	0	0	0	0	0	0	0	0	0	0	0	0	0	0	0	0	1	0	0	0	0	0	0	0	0	0	0	0	0	0	0	0	0	0	0
34	0	0	0	0	0	0	0	0	0	0	0	0	0	0	0	0	0	0	0	0	2	0	0	0	0	0	0	0	0	0	0	0	0	0	0	0	0	0	0
35	0	0	0	0	0	0	0	0	0	0	0	0	0	0	0	0	0	0	0	2	2	0	0	0	0	0	0	0	0	0	0	0	0	0	0	0	0	0	0
36	0	0	0	0	0	0	0	0	0	0	0	0	0	0	0	0	0	0	0	0	0	0	0	0	0	0	0	0	0	0	0	0	1	2	0	0	0	0	0
37	0	0	0	0	0	0	0	0	0	0	0	0	0	2	0	0	0	0	0	0	0	0	0	0	0	0	0	0	0	0	0	0	0	0	0	1	0	0	0
38	0	0	0	0	0	0	0	0	0	0	0	0	0	1	0	0	0	0	0	0	0	0	0	0	0	0	0	0	0	0	0	0	0	0	0	0	0	0	0
39	0	0	0	0	0	0	0	0	0	0	0	0	0	2	0	0	0	0	0	0	0	0	0	0	0	0	0	0	0	0	0	0	0	0	0	0	0	0	0
40	2	5	0	0	0	0	0	0	0	0	0	0	0	0	0	0	0	0	0	0	0	0	0	0	0	0	0	0	0	0	0	0	0	0	0	0	0	0	0
41	2	0	0	0	1	1	1	0	0	0	0	0	0	0	0	0	0	0	0	0	0	0	0	0	0	0	0	0	0	0	0	0	0	0	0	0	0	0	0

## Sheet: Proteobacteria
Michael L. Weltzer and Scott R. Miller. Division-specific differences in bacterial community assembly of two alkaline hot spring ecosystems from Yellowstone National Park. Microbial Ecology. Division of Biological Sciences, The University of Montana, Missoula, MT 59812 USA. E-mail scott.miller@umontana.edu
Presence/absence data for the 39 samples
OTU	RC1a	RC1b	RC2a	RC2b	RC3a	RC3b	RC4a	RC4b	RC5a	RC5b	RC6a	RC6b	RC7a	RC7b	RC8a	RC8b	RC9a	RC9b	RC10b	RC10c	WC1a	WC1b	WC2a	WC2b	WC3b	WC3c	WC4a	WC4b	WC5a	WC5b	WC6a	WC6b	WC7a	WC7b	WC8a	WC8b	WC9a	WC9b	WC10c
1	0	11	19	20	1	0	0	0	0	0	0	0	0	0	0	0	0	0	0	0	8	7	11	6	1	9	6	0	1	0	0	0	0	0	0	0	0	0	0
2	0	0	0	0	0	0	0	0	0	0	0	0	0	0	0	0	0	0	0	0	5	11	2	1	0	16	0	0	0	0	0	0	0	0	0	0	0	0	0
3	0	0	0	0	0	0	0	0	0	0	0	0	0	0	0	0	0	0	0	0	2	12	0	0	1	0	0	0	0	0	0	0	0	0	0	0	0	0	0
4	0	0	0	0	0	0	0	0	0	0	0	0	0	0	0	0	0	0	0	0	15	3	3	4	2	0	4	0	4	0	0	0	0	0	0	0	0	0	0
5	1	0	0	1	3	5	1	1	11	1	0	0	0	0	0	1	0	0	0	0	0	1	0	0	8	0	0	3	1	0	0	0	0	0	1	0	0	6	0
6	0	0	0	0	0	0	0	0	0	0	0	0	0	0	0	0	0	0	0	0	4	2	0	0	0	0	0	0	0	0	0	0	0	0	0	0	0	0	0
7	2	0	1	0	0	0	0	0	2	0	0	0	0	0	0	0	0	0	0	0	1	4	0	0	1	0	0	0	0	0	0	0	0	0	0	0	0	0	0
8	0	1	5	5	5	14	3	2	12	1	0	0	0	0	0	0	0	0	0	0	2	3	2	0	0	1	0	1	0	0	1	0	0	0	0	0	0	0	0
9	0	0	0	0	0	0	0	0	0	0	0	0	0	0	0	0	0	0	0	0	2	0	0	0	3	1	1	0	0	0	0	0	0	0	0	0	0	0	0
10	0	0	0	0	0	1	1	0	9	0	0	0	0	0	0	0	0	0	0	0	0	0	0	0	0	0	0	0	0	0	0	0	0	0	0	0	0	0	0
11	1	1	2	0	0	0	2	2	2	1	0	0	0	0	0	0	0	0	0	0	0	1	0	0	0	0	0	0	0	0	0	0	0	0	0	0	0	0	0
12	0	0	2	1	4	0	1	1	3	0	0	0	0	0	0	1	0	0	0	0	0	3	1	5	7	0	0	0	0	0	0	0	0	2	0	0	0	0	0
13	2	0	7	3	2	0	0	0	0	0	0	0	0	0	0	0	0	0	0	0	1	5	0	0	0	0	0	0	0	0	0	0	0	0	0	0	0	0	0
14	0	0	0	0	0	0	0	0	0	0	0	0	0	0	0	0	0	0	0	0	0	0	0	0	0	0	0	0	0	0	0	0	0	1	0	0	0	0	0
15	0	0	0	0	0	0	0	0	0	0	0	0	0	0	0	0	0	0	0	0	0	0	0	0	0	0	0	0	0	0	0	0	0	0	0	0	0	0	4
16	0	0	0	0	0	0	0	0	0	0	0	0	0	0	0	0	0	0	0	0	1	0	0	0	0	0	0	0	0	0	0	0	0	0	0	0	0	0	0
17	0	0	0	0	1	1	0	2	1	1	0	0	0	0	0	0	0	0	0	0	3	2	0	0	1	0	0	0	0	0	0	0	0	0	0	0	0	0	0
18	0	0	0	0	0	0	0	0	0	0	0	0	0	0	0	0	0	0	0	0	1	0	0	0	0	0	0	0	0	0	0	0	0	0	0	0	0	0	0
19	0	0	0	0	0	0	0	0	0	0	0	0	1	0	0	0	0	0	0	0	0	0	0	0	0	0	0	0	0	0	0	0	0	0	0	0	0	0	2
20	0	0	1	0	0	0	0	0	0	0	0	0	0	0	0	0	0	0	0	0	0	0	0	0	0	0	0	0	0	0	0	0	0	0	0	0	0	0	1
21	0	0	0	0	0	0	0	0	0	0	0	0	0	0	0	0	0	0	0	0	0	1	0	0	1	0	0	0	0	0	0	0	0	0	0	0	0	0	0
22	0	0	0	0	0	0	0	0	0	0	0	0	0	0	0	0	0	0	0	4	0	0	0	0	0	0	0	0	0	0	0	0	0	0	0	0	0	0	0
23	0	0	0	0	0	0	0	0	0	0	0	0	0	0	0	0	0	0	0	0	1	0	0	0	0	0	0	0	0	0	0	0	0	0	0	0	0	0	0
24	3	3	9	1	6	6	7	3	0	0	0	0	0	0	0	0	0	0	0	0	0	1	0	2	2	0	0	0	0	0	0	0	0	0	0	0	0	0	0
25	0	0	0	0	0	0	0	0	0	0	0	0	0	0	0	0	0	0	0	0	0	0	0	0	2	0	0	0	0	0	0	0	0	0	0	0	0	0	0
26	0	0	0	0	0	0	0	0	0	1	0	0	0	0	0	0	0	0	0	0	0	0	0	0	1	0	1	0	0	0	0	0	1	0	0	0	0	0	0
27	1	0	0	0	0	3	1	0	0	0	0	0	0	0	0	0	0	0	0	0	1	0	2	0	1	0	0	0	0	0	0	0	0	0	0	0	0	0	0
28	0	0	0	0	0	0	0	0	0	0	0	0	0	0	0	0	0	0	0	0	0	0	0	0	1	0	0	1	0	0	0	0	0	0	0	0	0	0	0
29	0	0	0	0	0	0	0	0	0	0	0	0	0	0	0	0	0	0	0	0	0	0	0	0	5	0	0	0	0	0	0	0	0	1	0	0	0	0	0
30	0	0	0	0	0	0	0	0	0	0	0	0	0	0	0	0	0	0	0	0	3	0	0	0	0	0	2	0	0	0	0	0	0	0	0	0	0	0	0
31	0	0	1	1	0	0	1	0	1	0	0	0	0	0	0	0	0	0	0	0	0	0	0	0	1	0	0	0	0	0	0	0	0	0	0	0	1	0	2
32	0	0	0	0	0	0	0	0	0	0	0	0	0	0	0	0	0	0	0	0	0	0	0	0	2	0	0	0	0	0	0	0	0	0	0	0	0	0	0
33	0	0	0	0	1	0	0	0	0	0	0	0	0	0	0	0	0	0	0	0	0	0	0	0	0	0	0	0	0	0	0	0	1	0	0	0	0	0	2
34	1	1	0	0	0	0	0	0	0	0	0	0	0	0	0	0	0	0	0	0	0	0	0	0	0	0	0	0	0	0	0	0	0	0	0	0	0	0	0
35	0	0	0	0	0	0	0	0	0	0	0	0	0	0	0	0	1	0	0	0	0	0	0	0	0	0	0	0	0	0	0	0	0	0	0	0	0	0	0
36	0	0	0	0	0	0	0	0	0	2	0	0	0	0	0	0	0	0	0	0	0	0	0	0	0	0	0	0	0	0	0	0	0	0	0	0	0	0	0
37	0	0	0	0	0	0	0	0	3	0	0	0	0	0	0	0	0	0	0	0	3	2	0	0	0	0	0	0	1	0	0	0	0	0	0	0	0	0	0
38	0	0	0	0	0	0	0	0	0	0	0	0	0	0	0	0	0	0	0	0	3	1	0	0	0	0	0	0	0	0	0	0	0	0	0	0	0	0	0
39	0	0	0	0	0	0	0	0	0	0	0	0	0	0	0	0	0	0	0	0	0	0	0	0	0	0	0	0	0	0	0	0	0	0	0	0	0	0	1
40	0	0	0	0	0	0	0	0	0	0	0	0	0	0	0	0	0	0	0	1	0	0	0	0	0	0	0	0	0	0	0	0	0	0	0	0	0	0	0
41	0	0	0	0	0	0	0	0	0	0	0	1	0	0	0	0	0	0	0	0	0	0	0	0	0	0	0	0	0	0	0	0	0	0	0	0	0	0	0

## Sheet: Thermotogales 
Michael L. Weltzer and Scott R. Miller. Division-specific differences in bacterial community assembly of two alkaline hot spring ecosystems from Yellowstone National Park. Microbial Ecology. Division of Biological Sciences, The University of Montana, Missoula, MT 59812 USA. E-mail scott.miller@umontana.edu
Presence/absence data for the 39 samples
OTU	RC1a	RC1b	RC2a	RC2b	RC3a	RC3b	RC4a	RC4b	RC5a	RC5b	RC6a	RC6b	RC7a	RC7b	RC8a	RC8b	RC9a	RC9b	RC10b	RC10c	WC1a	WC1b	WC2a	WC2b	WC3b	WC3c	WC4a	WC4b	WC5a	WC5b	WC6a	WC6b	WC7a	WC7b	WC8a	WC8b	WC9a	WC9b	WC10c
1	0	0	0	0	0	0	0	0	0	0	9	11	4	10	6	8	19	3	0	0	0	0	0	0	0	0	0	0	0	0	0	0	0	0	0	0	0	0	0
2	0	0	0	0	0	0	0	0	0	6	9	11	1	1	0	2	7	2	3	52	0	0	0	0	0	0	0	0	0	0	0	0	0	0	1	0	2	0	0
3	0	0	0	0	0	0	0	0	0	0	0	1	0	2	2	5	8	16	1	18	0	0	0	0	0	0	0	0	0	0	0	0	0	0	0	0	2	2	0

## Sheet: Thermus
Michael L. Weltzer and Scott R. Miller. Division-specific differences in bacterial community assembly of two alkaline hot spring ecosystems from Yellowstone National Park. Microbial Ecology. Division of Biological Sciences, The University of Montana, Missoula, MT 59812 USA. E-mail scott.miller@umontana.edu
Presence/absence data for the 39 samples
OTU	RC1a	RC1b	RC2a	RC2b	RC3a	RC3b	RC4a	RC4b	RC5a	RC5b	RC6a	RC6b	RC7a	RC7b	RC8a	RC8b	RC9a	RC9b	RC10b	RC10c	WC1a	WC1b	WC2a	WC2b	WC3b	WC3c	WC4a	WC4b	WC5a	WC5b	WC6a	WC6b	WC7a	WC7b	WC8a	WC8b	WC9a	WC9b	WC10c
1	0	0	0	0	0	0	1	0	1	2	6	4	9	10	0	0	0	3	0	0	0	0	0	0	1	0	1	0	0	0	1	1	0	0	6	4	4	5	0
2	0	1	0	0	0	4	7	3	14	12	0	0	0	0	0	0	0	0	0	6	0	0	1	0	2	3	31	2	12	9	12	4	1	0	0	0	0	0	0
3	0	0	0	0	0	0	1	1	2	0	0	0	0	0	0	0	0	0	0	0	1	1	1	0	4	0	0	0	0	0	0	0	0	0	0	0	0	0	0
4	0	0	0	0	0	0	0	0	0	0	0	0	0	0	0	0	0	0	0	0	0	0	0	0	0	0	2	0	0	0	0	0	0	0	0	0	0	0	0
5	0	0	0	0	0	0	0	0	0	0	0	0	0	0	0	0	0	0	0	1	0	0	0	0	0	0	0	0	0	0	0	0	0	0	0	1	7	0	0
6	0	0	0	0	0	0	0	0	1	0	0	0	0	2	0	3	24	5	28	5	0	0	0	0	0	0	0	0	0	0	0	0	0	0	0	0	0	0	0
7	0	0	0	0	0	0	1	1	6	2	5	3	7	6	2	27	37	33	77	42	0	0	0	0	0	0	0	1	1	0	1	0	0	0	3	2	27	7	44
